# Supplementary material for: Orchestration of protein acetylation as a toggle for cellular defense and virus replication
Source: PubMed Central journal article supplement (PMC6251895; doi:10.1038/s41467-018-07179-w), 2018-11-23
Supplement: 41467_2018_7179_MOESM1_ESM.pdf [file 41467_2018_7179_MOESM1_ESM.pdf]

## **Orchestration of protein acetylation as a toggle for cellular defense and virus replication**

Murray, et al.

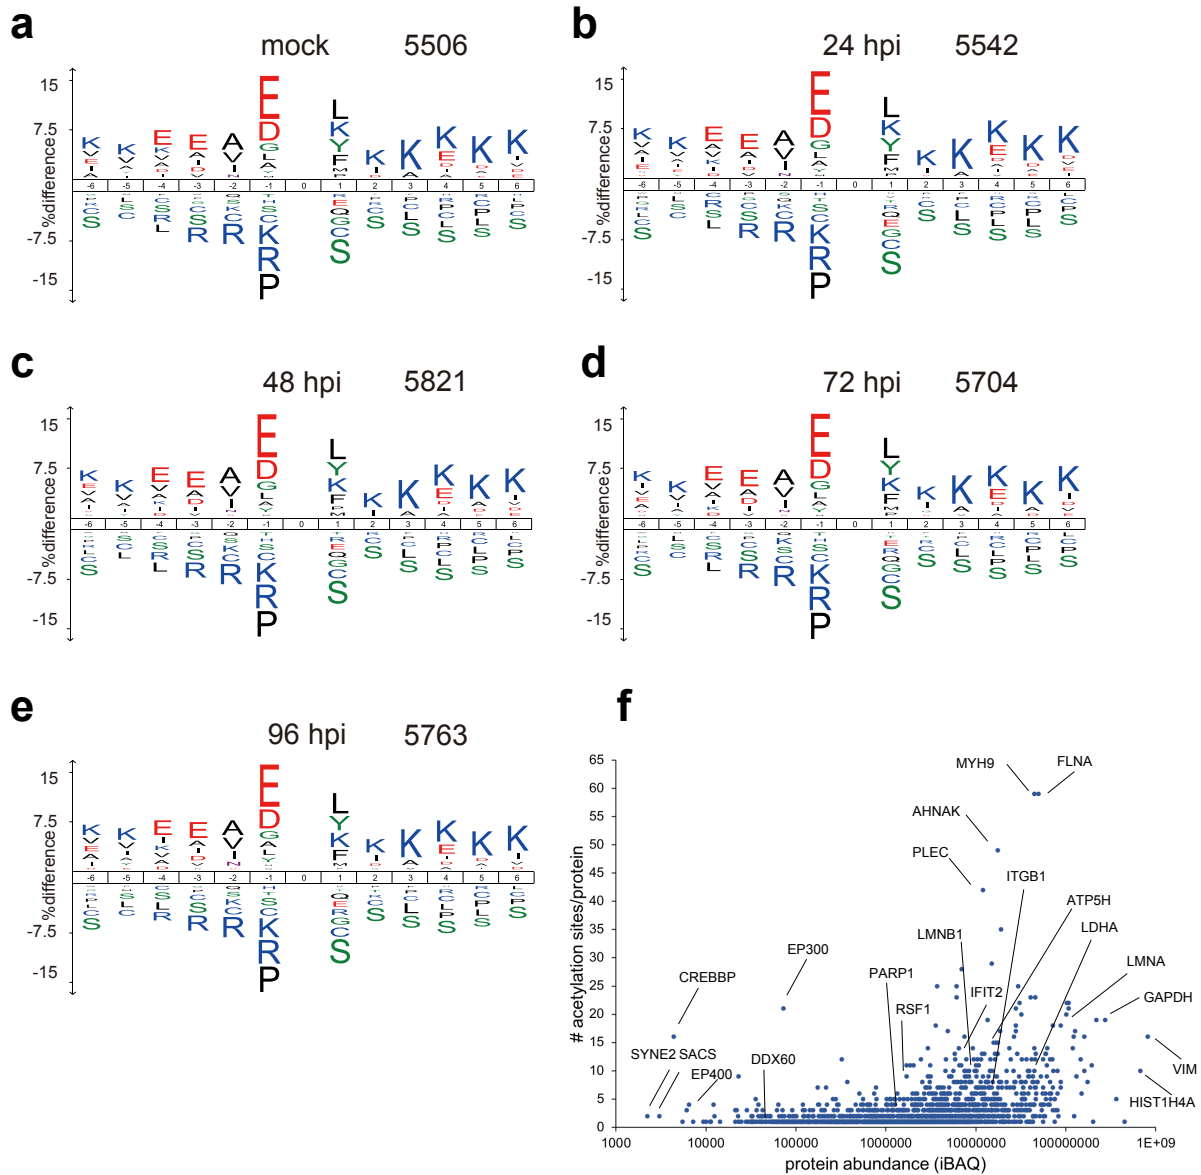

**Supplementary Figure 1. Analysis of acetylated cellular peptides from uninfected and infected cells.** Motifs from **a** uninfected and infected cells at **b** 24 hpi, **c** 48 hpi, **d** 72 hpi, and **e** 96 hpi were analyzed by IceLogo. Data represent results from a percentage difference scoring method with a P-value cut-off equal to 0.01 for the six amino acids flanking the acetylated lysine. The height of the letter at each position represents the difference in the amino acid residue frequency between the experimental set and the reference set. Numbers on the top indicate the number of peptides used for generating IceLogos. **f** Relationship between number of acetylation

sites and corresponding protein abundance. Protein quantification was performed using the iBAQ algorithm.

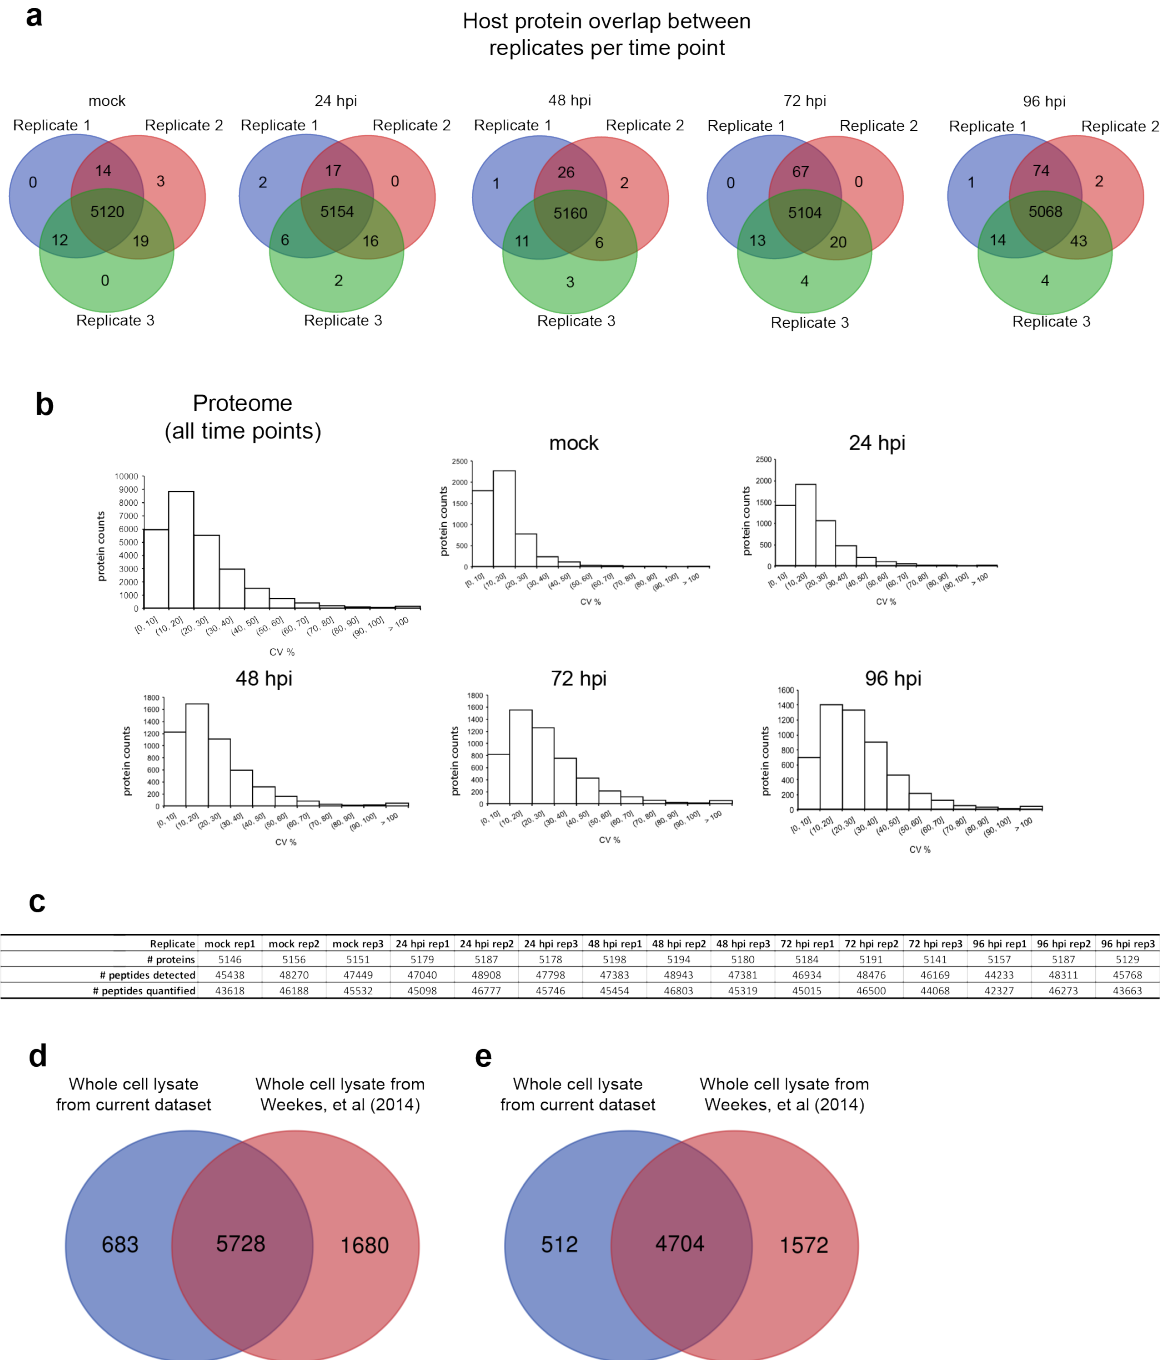

**Supplementary Figure 2. Comparison of the proteome datasets from the biological replicates, as well as with prior literature. a** Venn diagrams showing the overlap in host proteins quantified between three biological replicates at each time point during infection. **b** Distribution of the coefficient of variation (CV %) of all time points combined, and individual

time points for host whole proteome. **c** Comparison of number of host proteins and number of corresponding detected and quantified unmodified peptides across all three biological replicates in all time points. **d, e** Comparison of the number of identified proteins from the current proteome dataset and a previous study (Weekes, et al 2014). **d** Number of identified proteins with more one or more unique peptides (not including isoforms). **e** Number of identified proteins with two or more unique peptides (not including isoforms).

**a**

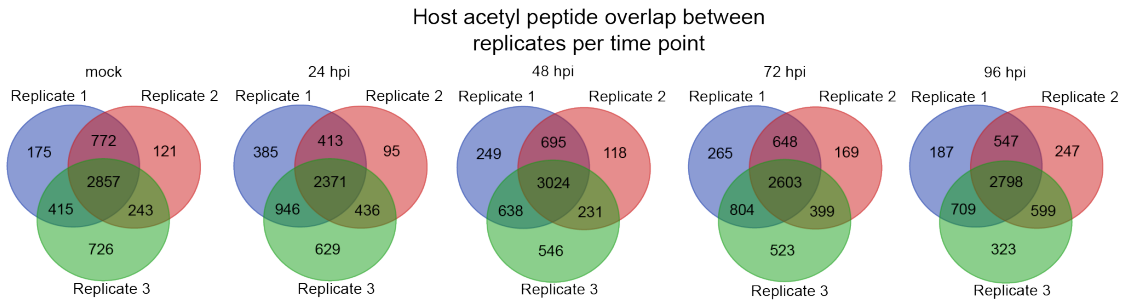

**b**

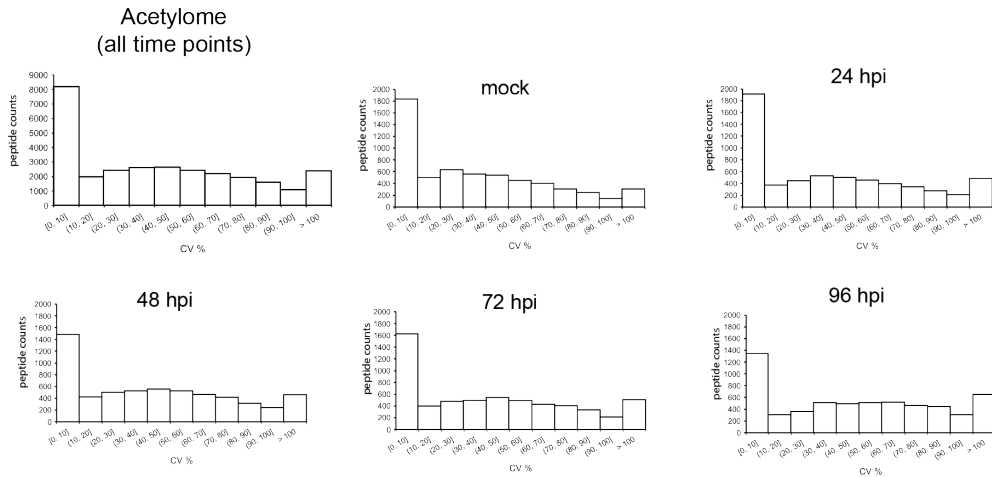

**Supplementary Figure 3. Comparison of the acetylome datasets from the biological**

**replicates. a** Venn diagrams showing the overlap in host acetylated peptides filtered and used in the quantification analysis between three biological replicates at each time point during infection. **b** Distribution of the coefficient of variation (CV %) of all time points combined, and individual time points for host peptides in the acetylome. CV percentages do not include imputed values.

**a**

| Replicate                                                         | mock rep1 | mock rep2 | mock rep3 | 24 hpi rep1 | 24 hpi rep2 | 24 hpi rep3 | 48 hpi rep1 | 48 hpi rep2 | 48 hpi rep3 | 72 hpi rep1 | 72 hpi rep2 | 72 hpi rep3 | 96 hpi rep1 | 96 hpi rep2 | 96 hpi rep3 |
|-------------------------------------------------------------------|-----------|-----------|-----------|-------------|-------------|-------------|-------------|-------------|-------------|-------------|-------------|-------------|-------------|-------------|-------------|
| # acetylated peptides                                             | 4219      | 3993      | 4241      | 4115        | 3315        | 4382        | 4606        | 4068        | 4439        | 4320        | 3819        | 4329        | 4241        | 4191        | 4429        |
| # acetylated proteins                                             | 1608      | 1563      | 1604      | 1606        | 1367        | 1631        | 1692        | 1559        | 1639        | 1610        | 1502        | 1593        | 1566        | 1590        | 1602        |
| % imputed acetyl peptide abundance (only used for trend analysis) | 27        | 31        | 26        | 29          | 42          | 24          | 20          | 29          | 23          | 25          | 34          | 25          | 26          | 27          | 23          |

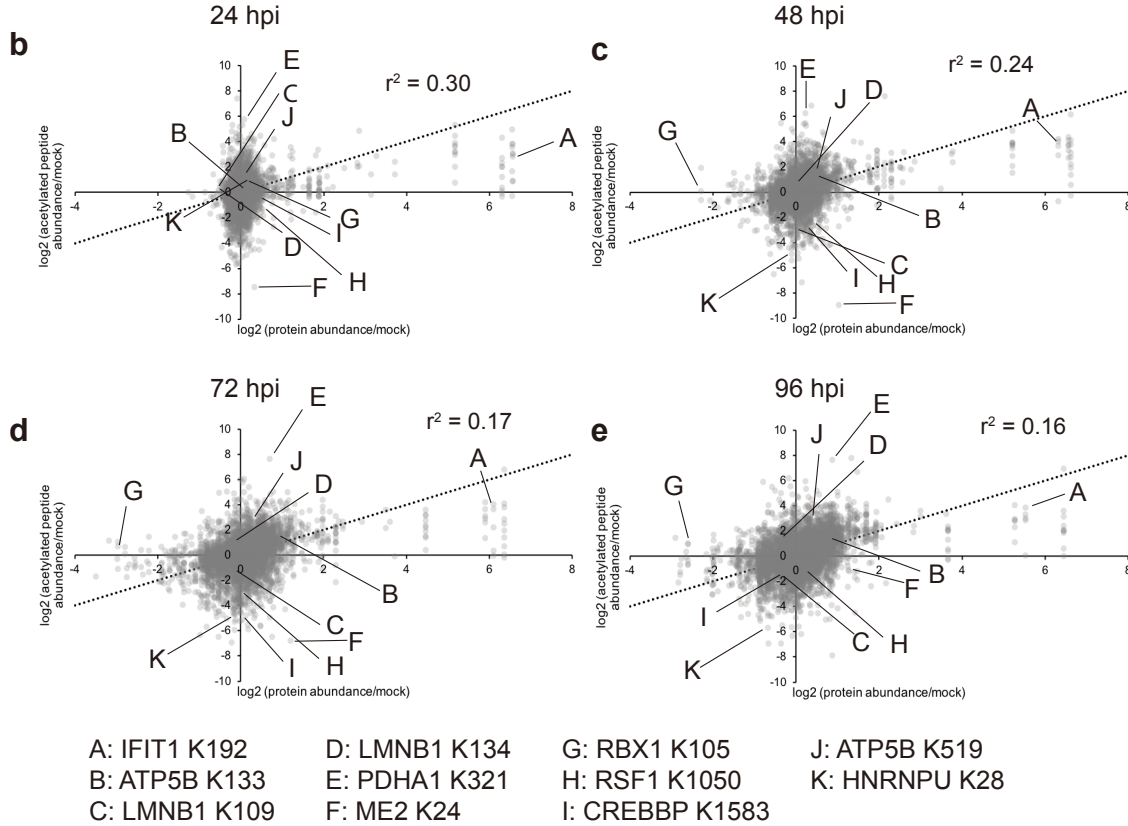

**Supplementary Figure 4. Assessment of correlation between changes in acetylated peptide abundance and changes in protein abundance for host proteins.** **a** Comparison of host acetylated peptides, the corresponding acetylated proteins, and the percentage of imputed values (used only in trend analyses in Figure 2b, Figure 3a, and Supplementary Figure 4b-e) across all three acetyl-IP biological replicates in all time points. These numbers represent the dataset of acetylated peptides that were filtered and used for quantitative analysis. **b-e** Dot plots of the log<sub>2</sub> fold change of acetylated peptide abundance (normalized to mock) and corresponding protein abundance (normalized to mock) at **b** 24, **c** 48, **d** 72, and **e** 96 hpi. Each dot represents one

acetylated peptide, and a number of peptides of interest are marked. The dotted line indicates a slope equal to 1.



**a**

| Cluster | # Proteins | Enriched GO Biological Processes                                                                                                                                                                                                          | Representative Proteins                                  | p-value                                                                                                                | FDR                                                                                                                    |
|---------|------------|-------------------------------------------------------------------------------------------------------------------------------------------------------------------------------------------------------------------------------------------|----------------------------------------------------------|------------------------------------------------------------------------------------------------------------------------|------------------------------------------------------------------------------------------------------------------------|
| 1       | 234        | TCA cycle, response to virus, type I interferon signaling, gluconeogenesis                                                                                                                                                                | DLD, IFIT1, STAT1, GOT1                                  | 3.89E-14, 1.18E-05, 1.19E-05, 6.10E-05                                                                                 | 5.11E-11, 1.74E-03, 1.74E-03, 4.45E-03                                                                                 |
| 2       | 551        | TCA cycle, glyoxylate metabolic process, tRNA aminoacylation for protein translation, canonical glycolysis, oxidative phosphorylation                                                                                                     | PDHA, DLAT, MARS, ENO1, NDUFB6                           | 2.22E-16, 8.40E-9, 5.11E-08, 1.03E-6, 1.82E-95                                                                         | 2.46E-13, 3.92E-06, 1.03E-05, 1.13E-04, 1.22E-03                                                                       |
| 3       | 641        | translation, rRNA processing, cell-cell adhesion, TCA cycle, nucleosome assembly, glyoxylate metabolic process                                                                                                                            | RPL5, LDHA, ATP5O, SMARCA5, OGDH                         | 1.11E-16, 1.11E-16, 1.11E-16, 4.28E-12, 1.19E-11, 5.57E-05                                                             | 3.94E-14, 3.94E-14, 3.94E-14, 1.33E-09, 3.28E-09, 3.95E-03                                                             |
| 4       | 833        | translation, RNA processing, cell-cell adhesion, antigen processing and presentation, regulation of ubiquitin-protein ligase activity, NIK/NF-kappaB signaling, protein folding, viral process, canonical glycolysis, nucleosome assembly | RPL4, RUVBL1, MYO6, PSMD8, HSP90AB1, CREBBP, ENO1, KAT6B | 1.11E-16, 1.11E-16, 1.11E-16, 1.11E-16, 1.11E-16, 5.77E-15, 2.93E-14, 2.49E-13, 9.94E-13, 6.69E-10, 1.27E-07, 5.85E-05 | 4.09E-14, 4.09E-14, 4.09E-14, 4.09E-14, 4.09E-14, 1.83E-12, 7.83E-12, 5.23E-11, 1.79E-10, 9.37E-08, 1.13E-05, 3.10E-03 |
| 5       | 662        | translation, viral transcription, protein targeting to membrane, cell-cell adhesion, nucleosome assembly, mRNA splicing, histone H3 acetylation, protein stabilization                                                                    | RPL4, FLNB, HIST2H2BF, HNRNPU, JADE1, HSP90AA1           | 1.11E-16, 1.11E-16, 1.11E-16, 1.11E-16, 2.67E-12, 1.59E-10, 8.56E-07, 5.24E-05                                         | 3.91E-14, 3.91E-14, 3.91E-14, 3.91E-14, 8.23E-10, 4.35E-08, 1.32E-04, 3.76E-03                                         |
| 6       | 329        | cell-cell adhesion, translation, protein targeting to membrane, viral transcription, nucleosome assembly, rRNA processing, cell-junction assembly, regulation of mRNA stability                                                           | PFN1, EIF4A1, RPS9, H3F3A, ACTB, HNRNPD                  | 2.19E-14, 2.13E-12, 2.82E-12, 7.14E-12, 3.00E-07, 4.77E-07, 6.45E-07, 2.52E-05                                         | 3.59E-11, 1.54E-09, 1.54E-09, 2.93E-09, 7.02E-05, 9.78E-05, 1.06E-04, 3.22E-03                                         |
| 7       | 230        | beta-catenin-TCF complex assembly, nucleosome assembly                                                                                                                                                                                    | CREBBP, RSF1                                             | 7.34E-08, 6.81E-07                                                                                                     | 8.06E-05, 3.98E-04                                                                                                     |

**b**

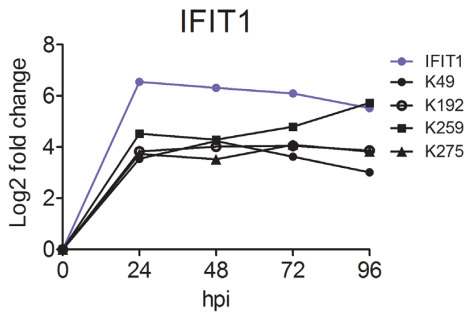

**c**

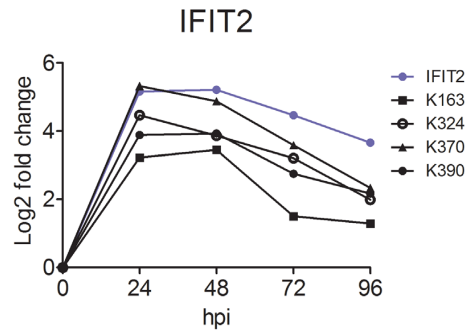

**d**

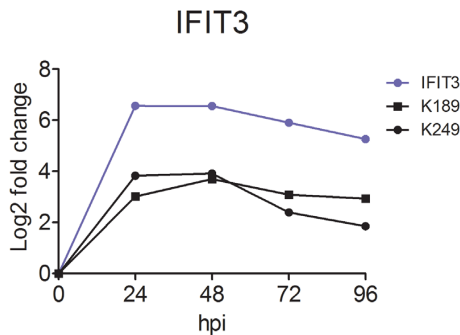

**Supplementary Figure 5. Distinct acetylation abundance trends and different enriched GO**

**Biological Processes.** a Enriched GO Biological Processes with p-values  $\leq E-05$  were

determined for each acetyl trend cluster through the Reactome plugin in Cytoscape. The p-value

and FDR for each term are shown in the same order as the terms are shown. **b-e** Comparison of log<sub>2</sub> fold change of protein abundance to acetylated peptide abundance for IFIT proteins. IFIT protein abundance (normalized to mock) is shown in blue. Abundance of each acetylated peptide that was detected in both mock and infection time points is shown in black (normalized to mock). **b** IFIT1, **c** IFIT2, **d** IFIT3.

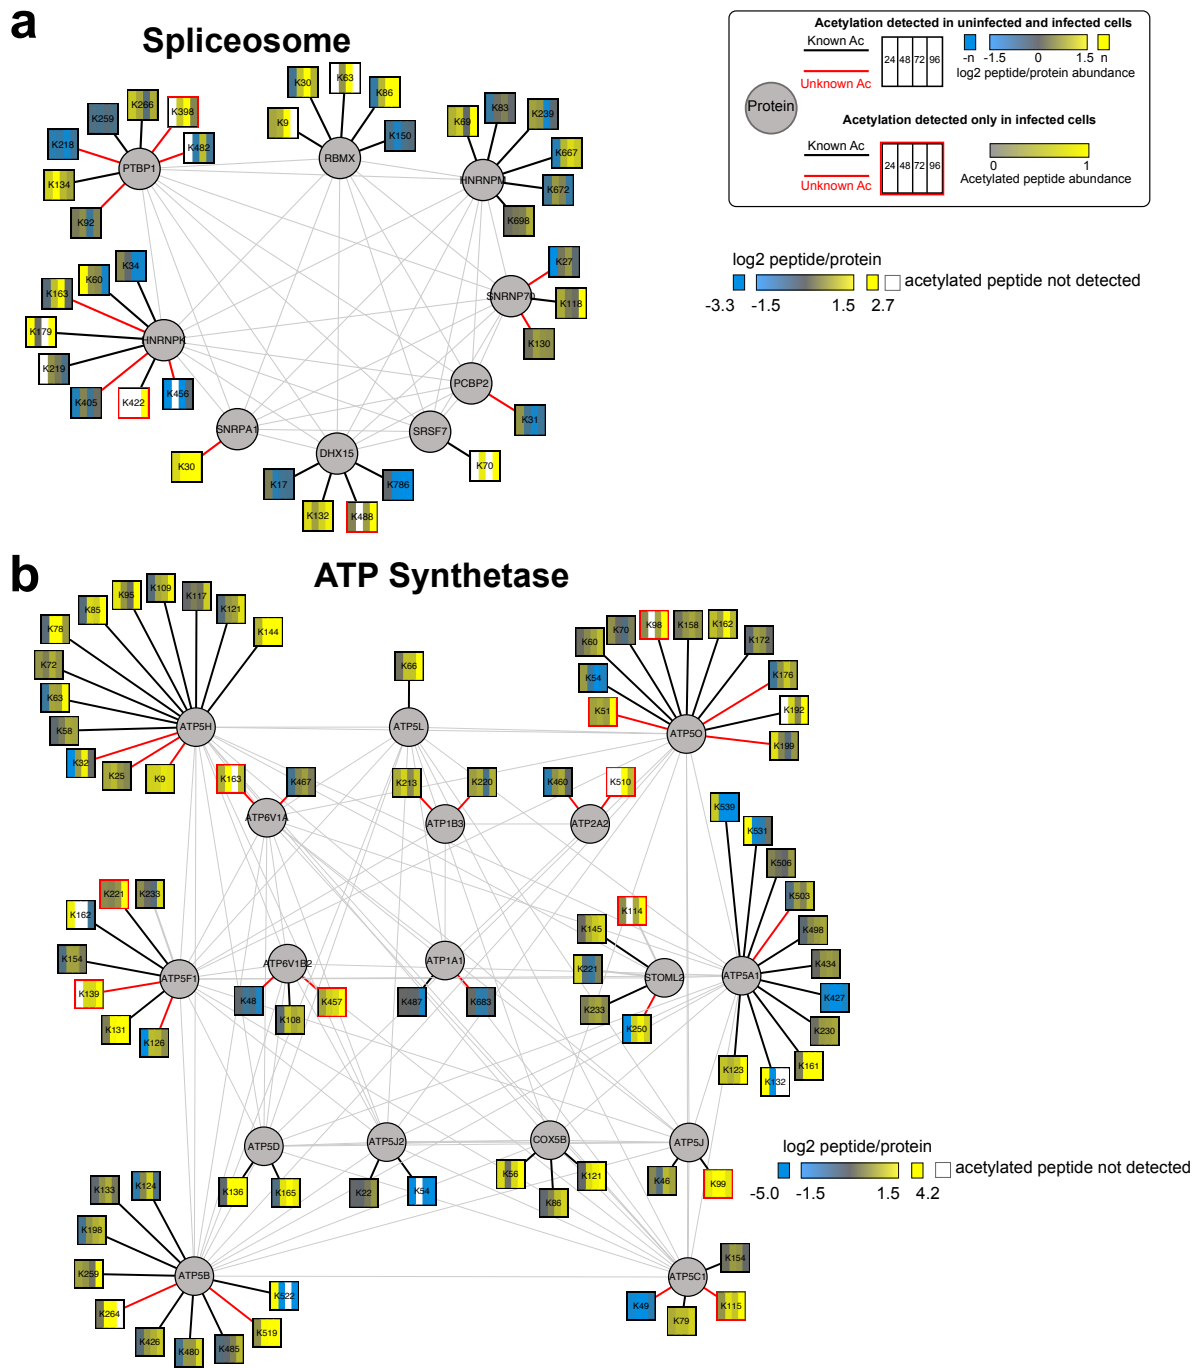

**Supplementary Figure 6. Site-specific acetylation trends are observed on mRNA splicing and ATP synthetase proteins. a, b** All detected acetylation sites on proteins from the indicated biological function representing different site-specific trends in acetylation during infection.

Log<sub>2</sub> peptide/protein values are shown unless the acetylated peptide was not identified in mock, in which case the acetylated peptide abundances during infection are shown scaled 0 to 1. **a** Spliceosome **b** ATP synthetase complex. Circles, proteins; squares, acetylation sites; red lines, previously unknown acetylation sites; black lines, known acetylation sites; black boxes, detected in mock; red boxes, only detected during infection. If a peptide was not quantified in a given time point, the corresponding column within the acetyl box is white.

**a**

Increasing acetylation in the nucleus

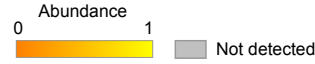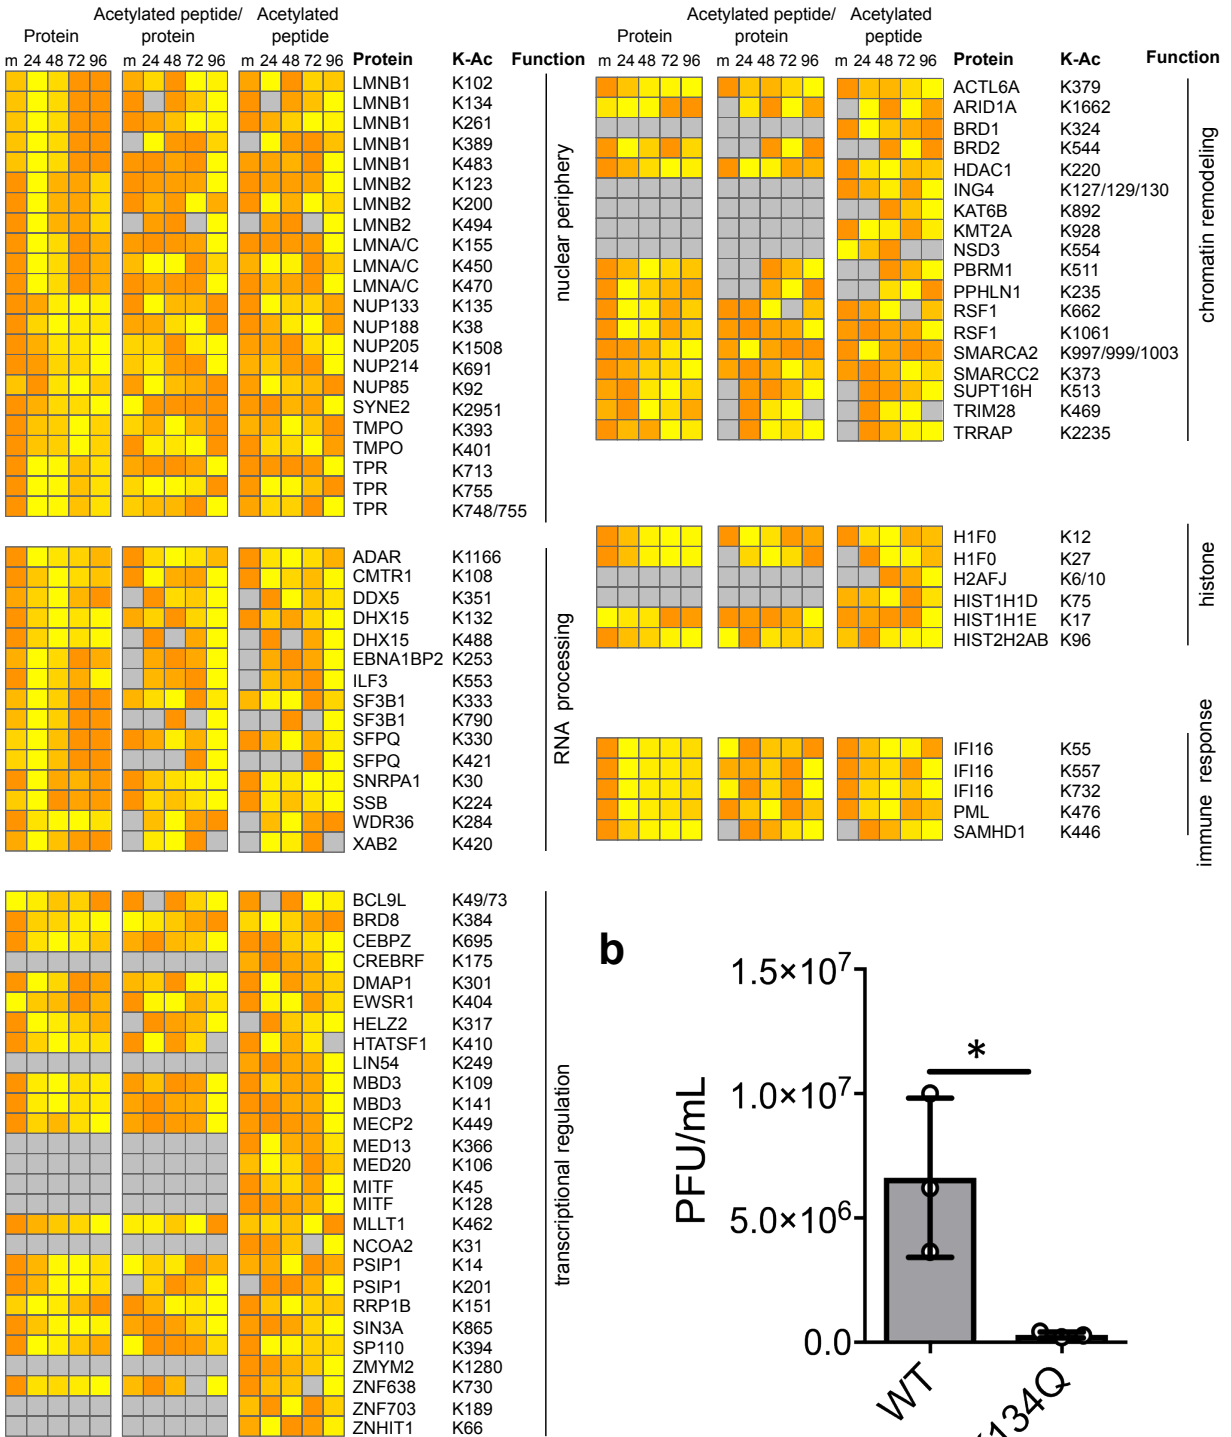

**b**

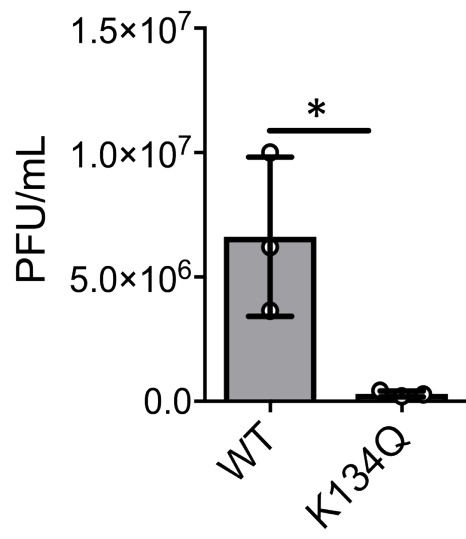

**Supplementary Figure 7. Acetylation is increased on a subset of nuclear proteins, including those at the nuclear periphery such as LMNB1.** **a** Sites on nuclear proteins with increased levels of acetylation during infection clustered by function. Abundances are scaled from 0 to 1 (left, protein abundance; middle, acetylated peptide abundance normalized to protein abundance; right, acetylated peptide abundance). **b** TCID<sub>50</sub> assessment of the effect of LMNB1 K134Q mutant on infectious extracellular virus produced. Average of three replicates ± SD. One-sided Student's t-test was used. \*  $p < 0.05$ .

1. MATATPPP... 10 20 30 40 50 60 70 80 90 100 110 120 130 140  
human  
chimpanzee  
gorilla  
sumatran orangutan  
olive baboon  
green monkey  
chusung macaque  
mouse  
rat  
Western clawed frog  
African clawed frog  
zebrafish  
turquoise killifish  
bluefin notho

150  
human  
chimpanzee  
gorilla  
sumatran orangutan  
olive baboon  
green monkey  
chusung macaque  
mouse  
rat  
Western clawed frog  
African clawed frog  
zebrafish  
turquoise killifish  
bluefin notho

300  
human  
chimpanzee  
gorilla  
sumatran orangutan  
green monkey  
chusung macaque  
zebrafish  
turquoise killifish  
bluefin notho

450  
human  
chimpanzee  
gorilla  
sumatran orangutan  
green monkey  
chusung macaque  
mouse  
bovine  
Western clawed frog  
African clawed frog  
zebrafish  
turquoise killifish  
bluefin notho

500  
human  
chimpanzee  
gorilla  
sumatran orangutan  
green monkey  
chusung macaque  
mouse  
bovine  
Western clawed frog  
African clawed frog  
zebrafish  
turquoise killifish  
bluefin notho

550  
human  
chimpanzee  
gorilla  
sumatran orangutan  
green monkey  
chusung macaque  
mouse  
bovine  
Western clawed frog  
African clawed frog  
zebrafish  
turquoise killifish  
bluefin notho

600  
human  
chimpanzee  
gorilla  
sumatran orangutan  
green monkey  
chusung macaque  
mouse  
bovine  
Western clawed frog  
African clawed frog  
zebrafish  
turquoise killifish  
bluefin notho

650  
human  
chimpanzee  
gorilla  
sumatran orangutan  
green monkey  
chusung macaque  
mouse  
bovine  
Western clawed frog  
African clawed frog  
zebrafish  
turquoise killifish  
bluefin notho

700  
human  
chimpanzee  
gorilla  
sumatran orangutan  
green monkey  
chusung macaque  
mouse  
bovine  
Western clawed frog  
African clawed frog  
zebrafish  
turquoise killifish  
bluefin notho

750  
human  
chimpanzee  
gorilla  
sumatran orangutan  
green monkey  
chusung macaque  
mouse  
bovine  
Western clawed frog  
African clawed frog  
zebrafish  
turquoise killifish  
bluefin notho

800  
human  
chimpanzee  
gorilla  
sumatran orangutan  
green monkey  
chusung macaque  
mouse  
bovine  
Western clawed frog  
African clawed frog  
zebrafish  
turquoise killifish  
bluefin notho

850  
human  
chimpanzee  
gorilla  
sumatran orangutan  
green monkey  
chusung macaque  
mouse  
bovine  
Western clawed frog  
African clawed frog  
zebrafish  
turquoise killifish  
bluefin notho

900  
human  
chimpanzee  
gorilla  
sumatran orangutan  
green monkey  
chusung macaque  
mouse  
bovine  
Western clawed frog  
African clawed frog  
zebrafish  
turquoise killifish  
bluefin notho

950  
human  
chimpanzee  
gorilla  
sumatran orangutan  
green monkey  
chusung macaque  
mouse  
bovine  
Western clawed frog  
African clawed frog  
zebrafish  
turquoise killifish  
bluefin notho

1000  
human  
chimpanzee  
gorilla  
sumatran orangutan  
green monkey  
chusung macaque  
mouse  
bovine  
Western clawed frog  
African clawed frog  
zebrafish  
turquoise killifish  
bluefin notho

**Supplementary Figure 8. Sequence alignment of identified LMNB1 acetylated lysines and regulatory phosphorylated serines from different vertebrate species.** Protein amino acid sequences from 16 species were retrieved from Uniprot, aligned by MultAlin, and colored by ESPript3. The conserved acetylated lysine sites detected in this study are highlighted in yellow and conserved phosphorylated serine sites of known function are highlighted in cyan.



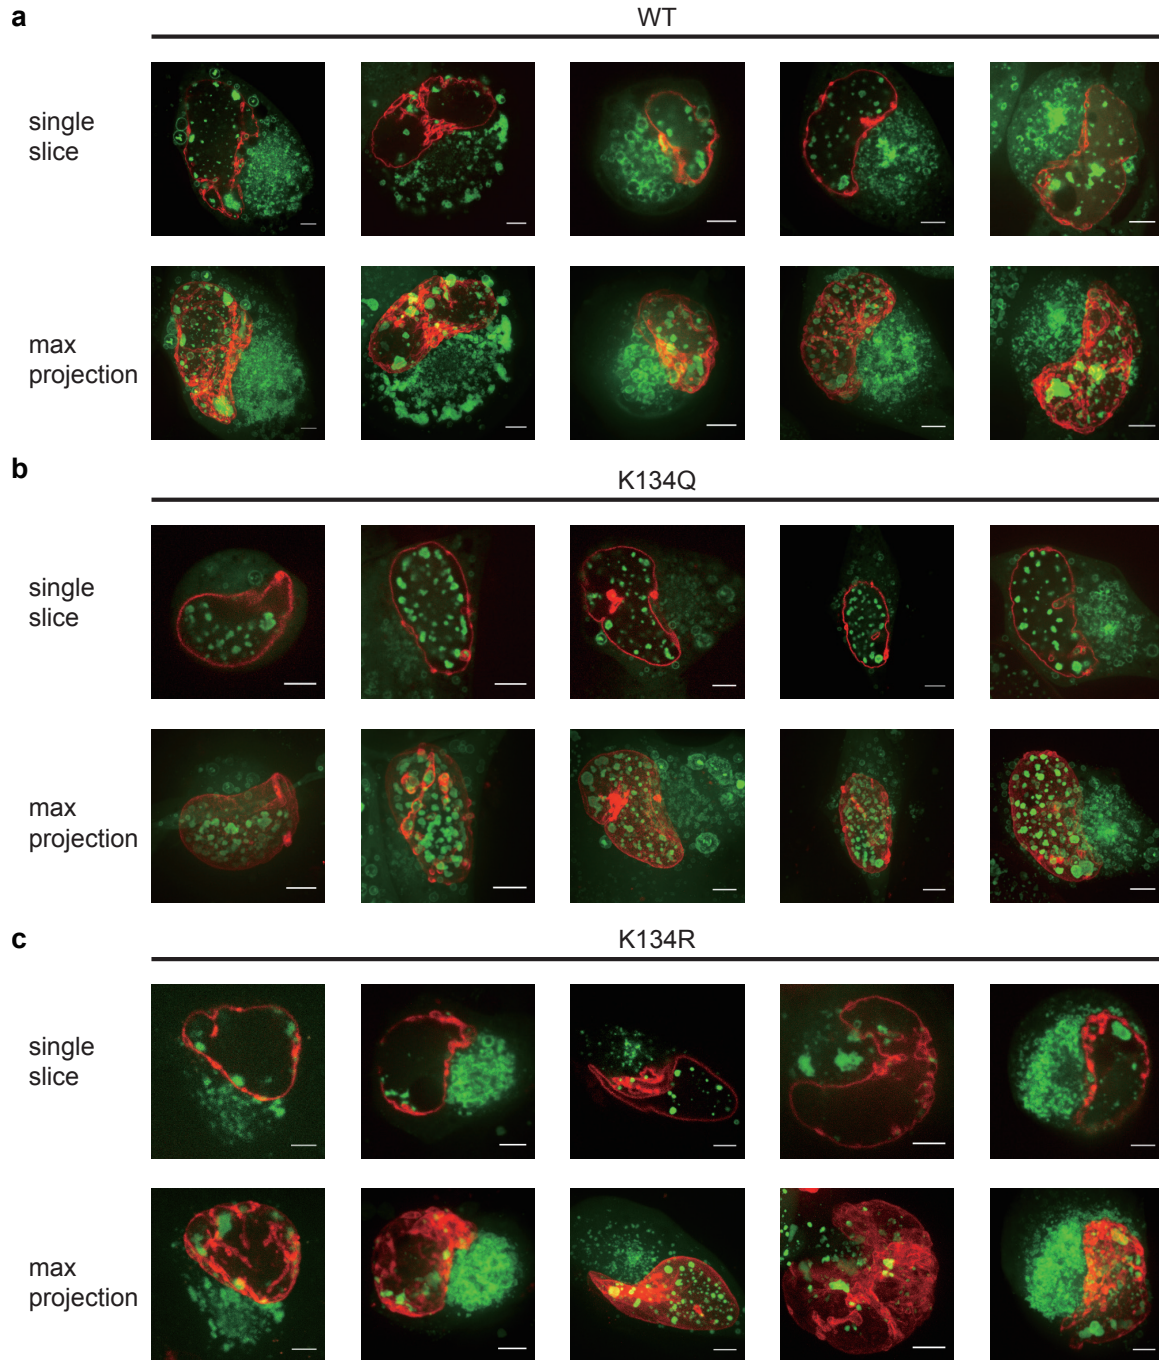

**Supplementary Figure 9. Acetylation of LMNB1 impedes nuclear capsid egress.** Additional examples of live cell confocal fluorescence microscopy images of cells transfected with **a** mCherry-LMNB1 WT, **b** K134Q, or **c** K134R (red) and infected with HCMV AD169 UL32-

GFP (green) at 120 hpi. Five representative images for each construct are shown as a single slice through the center of the Z-stack (upper row) and as a maximum projection of the Z-stack (bottom row). The rightmost images for each construct are the single slice and maximum projection that correspond to the images shown in Figure 5a; scale bar = 5  $\mu$ m.

96 hpi

WT

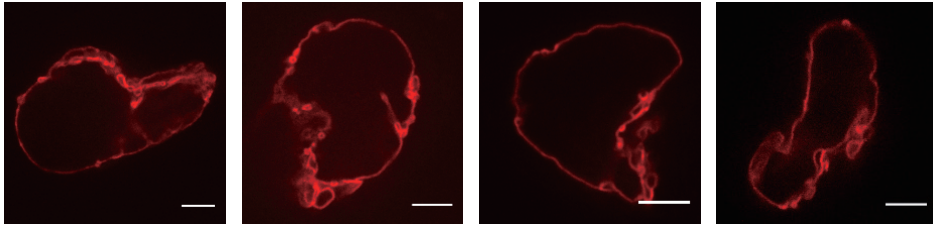

K134Q

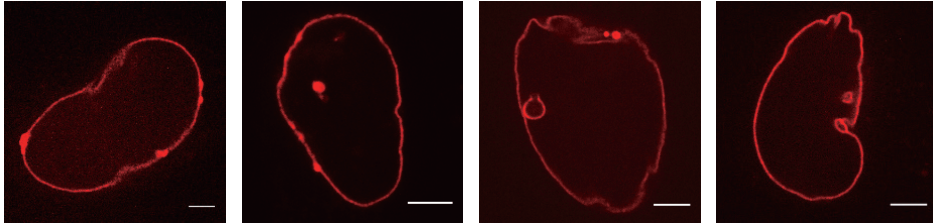

K134R

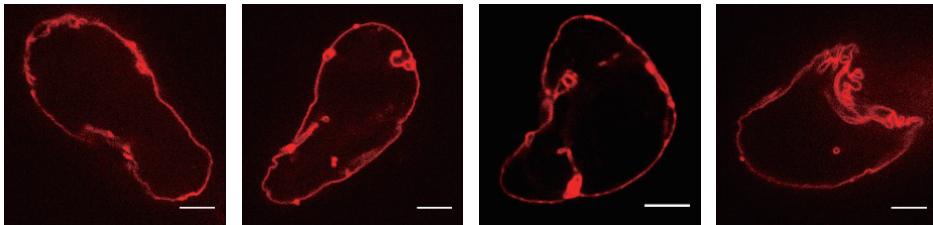

120 hpi

WT

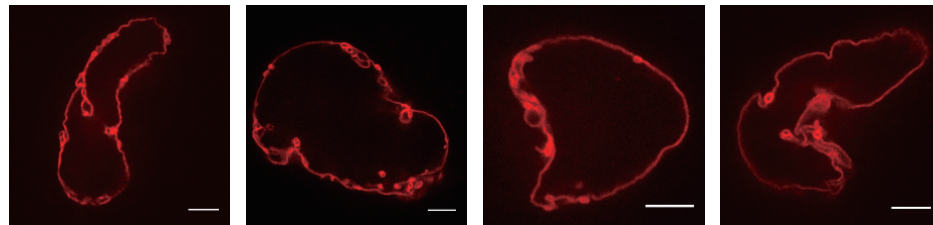

K134Q

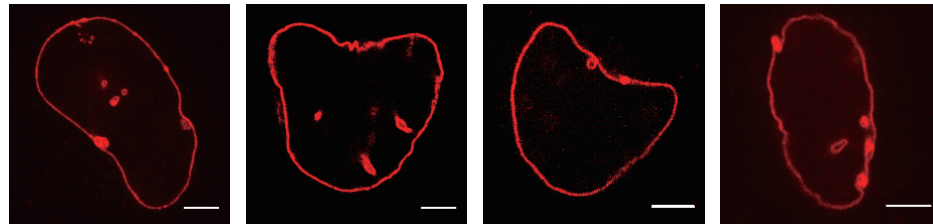

K134R

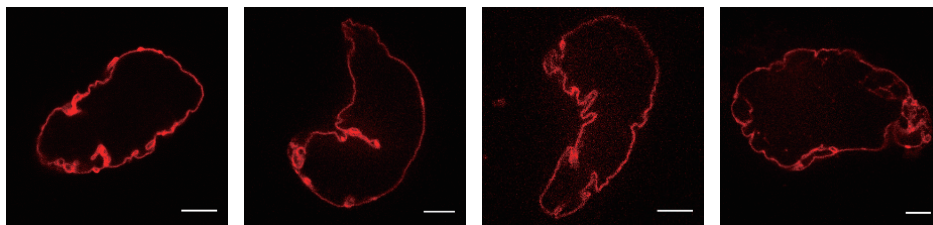

**Supplementary Figure 10. Acetylation at K134 on LMNB1 decreases nuclear periphery disruption.** Cells transfected with mCherry-LMNB1 WT, K134Q, or K134R (red) and infected with HCMV were imaged by live cell confocal fluorescence microscopy at 96 and 120 hpi. Four representative images for each LMNB1 construct per time point are shown as a single slice through the center of the Z-stack; scale bar = 5  $\mu$ m.

**a**

| Replicate             | 24 hpi rep1 | 24 hpi rep2 | 24 hpi rep3 | 48 hpi rep1 | 48 hpi rep2 | 48 hpi rep3 | 72 hpi rep1 | 72 hpi rep2 | 72 hpi rep3 | 96 hpi rep1 | 96 hpi rep2 | 96 hpi rep3 |
|-----------------------|-------------|-------------|-------------|-------------|-------------|-------------|-------------|-------------|-------------|-------------|-------------|-------------|
| # acetylated peptides | 17          | 10          | 19          | 15          | 13          | 27          | 18          | 13          | 29          | 24          | 16          | 31          |
| # acetylated proteins | 12          | 8           | 13          | 11          | 9           | 17          | 13          | 9           | 19          | 14          | 11          | 19          |

**b**

| Replicate             | 24 hpi rep1 | 24 hpi rep2 | 24 hpi rep3 | 48 hpi rep1 | 48 hpi rep2 | 48 hpi rep3 | 72 hpi rep1 | 72 hpi rep2 | 72 hpi rep3 | 96 hpi rep1 | 96 hpi rep2 | 96 hpi rep3 |
|-----------------------|-------------|-------------|-------------|-------------|-------------|-------------|-------------|-------------|-------------|-------------|-------------|-------------|
| # proteins            | 75          | 73          | 77          | 79          | 79          | 88          | 83          | 85          | 90          | 89          | 90          | 91          |
| # peptides detected   | 376         | 380         | 482         | 527         | 528         | 791         | 680         | 766         | 944         | 787         | 917         | 1007        |
| # peptides quantified | 349         | 354         | 406         | 504         | 504         | 584         | 660         | 739         | 767         | 761         | 885         | 912         |

**c**

| Capsid     |                                                                                                                                                                                                     |                                                                                                                                                                                                                                                                                                       |                     |                     |                                                                                 |
|------------|-----------------------------------------------------------------------------------------------------------------------------------------------------------------------------------------------------|-------------------------------------------------------------------------------------------------------------------------------------------------------------------------------------------------------------------------------------------------------------------------------------------------------|---------------------|---------------------|---------------------------------------------------------------------------------|
| Protein    | Domain region (aa)                                                                                                                                                                                  | Domain region function                                                                                                                                                                                                                                                                                | Protein length (aa) | Temporal expression | Acetylated lysine(s)                                                            |
| UL46       |                                                                                                                                                                                                     |                                                                                                                                                                                                                                                                                                       | 290                 | L                   | 25, 270                                                                         |
| UL85       |                                                                                                                                                                                                     |                                                                                                                                                                                                                                                                                                       | 306                 | L                   | 15, 23, 166                                                                     |
| UL86       | 1-59<br>60-189,<br>234-290,<br>363-397,<br>1032-1106<br>190-233<br>291-362<br>388-480,<br>1322-1370<br>481-1031<br>1107-1321                                                                        | N-lasso<br>Johnson fold<br>helix-hairpin dimerization channel<br>upper region<br>buttress                                                                                                                                                                                                             | 1370                | L                   | 24, 85, 116,<br>165, 220,<br>377, 413,<br>415, 439,<br>513, 1257,<br>1280, 1336 |
| Envelope   |                                                                                                                                                                                                     |                                                                                                                                                                                                                                                                                                       |                     |                     |                                                                                 |
| Protein    | Domain region (aa)                                                                                                                                                                                  | Domain region function                                                                                                                                                                                                                                                                                | Protein length (aa) | Temporal expression | Acetylated lysine(s)                                                            |
| gB         | 1-31<br>92-111<br>152-158<br>237-244<br>411-447<br>686-748<br>694-897                                                                                                                               | signal peptide<br>disintegrin-like domain<br>involved in fusion and/or binding to host membrane<br>involved in fusion and/or binding to host membrane<br>required to assemble an antigenic region<br>hydrophobic membrane proximal region<br>internalization motif                                    | 906                 | DE                  | 230, 370,<br>633, 669,<br>699                                                   |
| gM (UL100) | 1-13<br>14-34<br>35-79<br>80-100<br>101-126<br>127-147<br>148-151<br>152-172<br>173-200<br>201-221<br>222-239<br>240-260<br>261-264<br>265-285<br>286-298<br>299-319<br>320-372<br>300-372<br>1-118 | intravirion<br>helical<br>virion surface<br>intravirion<br>helical<br>virion surface<br>helical<br>intravirion<br>helical<br>virion surface<br>helical<br>intravirion<br>helical<br>virion surface<br>helical<br>intravirion<br>helical<br>intravirion<br>interacts with FIP4<br>region that binds gN | 372                 | L                   | 8, 108, 331                                                                     |
| gL         | 1-30                                                                                                                                                                                                | signal peptide                                                                                                                                                                                                                                                                                        | 278                 | L                   | 248                                                                             |
| gH (UL75)  | 24-270<br>218-281<br>721-741<br>742-743                                                                                                                                                             | virion surface<br>interacts with gL<br>helical<br>intravirion                                                                                                                                                                                                                                         | 743                 | L                   | 131, 327,<br>405                                                                |
| gO (UL74)  | 80-100                                                                                                                                                                                              | helical                                                                                                                                                                                                                                                                                               | 466                 | L                   | 188                                                                             |
| IRL10      | 24-294<br>295-317<br>318-345                                                                                                                                                                        | virion surface<br>helical<br>intravirion                                                                                                                                                                                                                                                              | 345                 | DE                  | 175                                                                             |

| Tegument |                                                                                                                                       |                                                                                                                                                                                                                                                                                                                                                                                |                     |                     |                                                                                          |
|----------|---------------------------------------------------------------------------------------------------------------------------------------|--------------------------------------------------------------------------------------------------------------------------------------------------------------------------------------------------------------------------------------------------------------------------------------------------------------------------------------------------------------------------------|---------------------|---------------------|------------------------------------------------------------------------------------------|
| Protein  | Domain region (aa)                                                                                                                    | Domain region function                                                                                                                                                                                                                                                                                                                                                         | Protein length (aa) | Temporal expression | Acetylated lysine(s)                                                                     |
| UL25     |                                                                                                                                       |                                                                                                                                                                                                                                                                                                                                                                                | 666                 | L                   | 609                                                                                      |
| UL26     | 1-34<br>184-222                                                                                                                       | important for viral growth<br>essential for replication                                                                                                                                                                                                                                                                                                                        | 222                 | DE                  | 203                                                                                      |
| UL32     | 1-275<br>982-1048                                                                                                                     | capsid (SCP) binding region<br>C terminal interacts with UL96                                                                                                                                                                                                                                                                                                                  | 1048                | DE                  | 237, 373,<br>384, 805,<br>903, 1000                                                      |
| UL35     |                                                                                                                                       |                                                                                                                                                                                                                                                                                                                                                                                | 640                 | DE                  | 118                                                                                      |
| UL43     |                                                                                                                                       |                                                                                                                                                                                                                                                                                                                                                                                | 423                 | L                   | 135                                                                                      |
| UL44     | 1-309<br>1-290<br>162-174<br>425-431<br>40-433<br>291-433<br>129-140<br>1-290                                                         | needed for function as a processivity factor<br>self-dimerization<br>highly flexible loop, involved in DNA binding<br>NLS<br>interacts with UL112/113<br>interacts with UL114<br>connector loop, interacts with UL64<br>interacts with UL84                                                                                                                                    | 433                 | DE                  | 101, 288,<br>338, 376                                                                    |
| UL45     | 1-200, 313,<br>433                                                                                                                    | interacts with Ubc9                                                                                                                                                                                                                                                                                                                                                            | 906                 | DE                  | 523, 614                                                                                 |
| UL47     | 474-983                                                                                                                               | interaction with UL48                                                                                                                                                                                                                                                                                                                                                          | 983                 | L                   | 281                                                                                      |
| UL48     | 1-238<br>322-754                                                                                                                      | deubiquitination activity<br>interacts with UL47                                                                                                                                                                                                                                                                                                                               | 2241                | DE                  | 439, 465,<br>481, 595,<br>640, 800,<br>1001, 1003,<br>1019, 1175,<br>1261, 1288,<br>1478 |
| UL50     | 52-80, 125<br>139<br>1-169                                                                                                            | heterodimerization with UL53<br>conserved                                                                                                                                                                                                                                                                                                                                      | 397                 | DE                  | 20, 132                                                                                  |
| UL54     | 379-421<br>492-588<br>696-742<br>771-790<br>805-845<br>905-919<br>962-970<br>978-988<br>1153-1159<br>1222-1227<br>1220-1249<br>1-1212 | conserved with other DNA-dependent DNA polymerases (labeled in an order): IV, 5-<br>region C, II, VI, III, I, VII, VI, I, II, III, binding of deoxynucleoside triphosphates, chelating the Mg <sup>2+</sup> ion, and interacting with primer and template; IV and 5-region C: 3' to 5' exonuclease function<br>NLSA<br>NLSB<br>interaction with UL44<br>interaction with UL114 | 1242                | DE                  | 500                                                                                      |
| UL69     | 17-30<br>35-46, 122,<br>132<br>387-501<br>596-624                                                                                     | UAP56 interaction<br>RNA binding domain<br>zinc finger CHC2-type<br>NES                                                                                                                                                                                                                                                                                                        | 744                 | L                   | 275, 580                                                                                 |
| UL82     |                                                                                                                                       |                                                                                                                                                                                                                                                                                                                                                                                | 599                 | L                   | 91, 376                                                                                  |
| UL83     | 1-386<br>387-470<br>471-561                                                                                                           | pyrin association domain<br>linker<br>conserved C terminal domain and NLS                                                                                                                                                                                                                                                                                                      | 561                 | L                   | 154, 176,<br>181, 215,<br>283, 378,<br>509, 538,<br>557                                  |
| UL84     | 1-68<br>101-200<br>161-170<br>229-238<br>360-367                                                                                      | association with pUL44 and viral DNA replication<br>interaction with CK2, essential for DNA replication<br>nuclear localization signal<br>nuclear export signal 1<br>nuclear export signal 2                                                                                                                                                                                   | 587                 | DE                  | 94, 339,<br>436                                                                          |
| UL94     |                                                                                                                                       |                                                                                                                                                                                                                                                                                                                                                                                | 345                 | DE                  | 306, 316,<br>324                                                                         |
| UL96     | 1-101<br>122-127                                                                                                                      | interaction with UL32<br>critical for virus maturation                                                                                                                                                                                                                                                                                                                         | 127                 | DE                  | 10                                                                                       |
| UL97     | 48-110<br>292-707<br>337-345<br>352-380<br>373-381<br>433-450                                                                         | NLS<br>important for phosphorylation activity<br>ATP binding/ Domain I (sim to PK)<br>Domain II (sim to PK)<br>Domain III (sim to PK)<br>Domain V (sim to PK)                                                                                                                                                                                                                  | 707                 | DE                  | 586                                                                                      |
| UL122    | 200-208                                                                                                                               | non-covalent SUMO1 binding region                                                                                                                                                                                                                                                                                                                                              | 580                 | IE                  | 21, 161,<br>337, 421                                                                     |
| US22     |                                                                                                                                       |                                                                                                                                                                                                                                                                                                                                                                                | 576                 | DE                  | 197, 305,<br>358                                                                         |

**Supplementary Figure 11. Viral acetylome.** **a** Comparison of the number of viral acetylated peptides and the corresponding acetylated viral proteins across all three acetyl-IP biological replicates in all infection time points. **b** Comparison of the number of viral proteins and the number of corresponding detected and quantified unmodified peptides across all three biological

replicates in all infection time points from the whole proteome dataset. **c** Functional domains, temporal expression, and acetylated lysine sites detected in this study on HCMV proteins known to be part of the capsid, envelope, and tegument. All domain information is annotated from Uniprot and primary literature.
